# Supplementary material
Source: ML conference proceedings conference paper supplement (https://proceedings.mlr.press/v119/kunin20a.html)
Supplement: Supplementary file [file kunin20a-supp.pdf]

## A. Code base

In this section we describe our implementation and highlight the technical details that allow its generality for use in any architecture. We used TensorFlow version 1.13.1 to conduct all experiments, and adhered to its interface. All code can be found at <https://github.com/neuroailab/neural-alignment>.

### A.1. Layers

The essential idea of our code base is that by implementing custom layers that match the TensorFlow API, but use custom operations for matrix multiplication (`matmul`) and two-dimensional convolutions (`conv2d`), then we can efficiently implement arbitrary feedforward networks using any credit assignment strategies with untied forward and backward weights. Our custom `matmul` and `conv2d` operations take in a forward and backward kernel. They use the forward kernel for the forward pass, but use the backward kernel when propagating the gradient. To implement this, we leverage the `@tf.custom_gradient` decorator, which allows us to explicitly define the forward and backward passes for that op. Our `Layer` objects implement custom dense and convolutional layers which use the custom operations described above. Both layers take in the same arguments as the native TensorFlow layers and an additional argument for the learning rule.

### A.2. Alignments

A learning rule is defined by the form of the layer-wise regularization  $\mathcal{R}$  added to the model at each layer. The custom layers take an instance of an alignment class which when called will define its alignment specific regularization and add it to the computational graph.

The learning rule are specializations of a parent `Alignment` object which implements a `__call__` method that creates the regularization function. The regularization function uses tensors that prevent the gradients from flowing to previous layers via `tf.stop_gradient`, keeping the alignment loss localized to a single layer. Implementation of the `__call__` method is delegated to subclasses, such that they can define their alignment specific regularization as a weighted sum of primitives, each of which is defined as a function.

### A.3. Optimizers

The total network loss is defined as the sum of the global cost function  $\mathcal{J}$  and the local alignment regularization  $\mathcal{R}$ . The optimizer class provides a framework for specifying how to optimize each part of the total network loss as a function of the global step.

In the `Optimizers` folder you will find two important files:

- `rate_scheduler.py` defines a scheduler which is a function of the global step, that allows you to adapt the components of the alignment weighting based on where it is in training. If you do not pass in a scheduling function, it will by default return a constant rate.
- `optimizers.py` provides a class which takes in a list of optimizers, as well as a list of losses to optimize. Each loss element is optimized with the corresponding optimizer at each step in training, allowing you to have potentially different learning rate schedules for different components of the loss. Minibatching is also supported.

## B. Experimental Details

In what follows we describe the metaparameters we used to run each of the experiments reported above, tabulated in Table 5. Any defaults from TensorFlow correspond to those in version 1.13.1.

### B.1. TPE search spaces

We detail the search spaces for each of the searches performed in §4. For each search, we trained approximately 60 distinct settings at a time using the HyperOpt package (Bergstra et al., 2011) using the ResNet-18 architecture and L2 weight decay of  $\lambda = 10^{-4}$  (He et al., 2016) for 45 epochs, corresponding to the point in training midway between the first and second learning rate drops. Each model was trained on its own Tensor Processing Unit (TPUv2-8 and TPUv3-8).

We employed a form of Bayesian optimization, a Tree-structured Parzen Estimator (TPE), to search the space of continuous and categorical metaparameters (Bergstra et al., 2011). This algorithm constructs a generative model of  $P[\text{score} \mid \text{configuration}]$  by updating a prior from a maintained history  $H$  of metaparameter configuration-loss pairs. The fitness function that is optimized over models is the expected improvement, where a given configuration  $c$  is meant to optimize  $EI(c) = \int_{x < c} P[x \mid c, H]$ . This choice of Bayesian optimization algorithm models  $P[c \mid x]$  via a Gaussian mixture, and restricts us to tree-structured configuration spaces.

#### B.1.1. $\mathcal{R}_{\text{WM}}^{\text{TPE}}$ SEARCH SPACE

Below is a description of the metaparameters and their ranges for the search that gave rise to  $\mathcal{R}_{\text{WM}}^{\text{TPE}}$  in Table 3.

- Gaussian input noise standard deviation  $\sigma \in [10^{-10}, 1]$  used in the backward pass, sampled uniformly.

Two Routes to Scalable Credit Assignment without Weight Symmetry

|                                      | $\mathcal{R}_{WM}^{TPE}$ | $\mathcal{R}_{WM+AD}^{TPE}$ | $\mathcal{R}_{WM+AD+OPS}^{TPE}$ | $\mathcal{R}_{IA}^{TPE}$ |
|--------------------------------------|--------------------------|-----------------------------|---------------------------------|--------------------------|
| Alternating Minimization             | True                     | True                        | True                            | True                     |
| Delay Epochs (de)                    | 2                        | 0                           | 0                               | 1                        |
| Train Batch Size ( $ \mathcal{B} $ ) | 2048                     | 256                         | 256                             | 256                      |
| SGDM Learning Rate                   | 1.0                      | 0.125                       | 0.125                           | 0.125                    |
| Alignment Optimizer                  | Vanilla GD               | Adam                        | Adam                            | Adam                     |
| Alignment Learning Rate ( $\eta$ )   | 1.0                      | 0.0053                      | 0.0025                          | 0.0098                   |
| $\sigma$                             | 0.6905                   | 0.9500                      | 0.6402                          | 0.8176                   |
| $\alpha/\beta$                       | 15.6607                  | 13.9040                     | 0.1344                          | 129.1123                 |
| $\beta$                              | 0.0283                   | $2.8109 \times 10^{-8}$     | 232.7856                        | 7.9990                   |
| $\gamma$                             | N/A                      | N/A                         | N/A                             | $3.1610 \times 10^{-6}$  |
| Forward Path Output (FO) Bias        | True                     | True                        | True                            | True                     |
| FO ReLU                              | True                     | True                        | True                            | True                     |
| FO BWMC                              | True                     | True                        | True                            | True                     |
| FO FWMC                              | False                    | False                       | True                            | True                     |
| FO FWL2N                             | False                    | False                       | False                           | False                    |
| Backward Path Output (BO) Bias       | False                    | False                       | False                           | True                     |
| BO ReLU                              | False                    | False                       | True                            | False                    |
| BO FWMC                              | False                    | False                       | False                           | True                     |
| BO FWL2N                             | False                    | False                       | True                            | True                     |
| Backward Path Input (BI) BWMC        | True                     | True                        | True                            | False                    |
| BI FWMC                              | False                    | False                       | False                           | False                    |
| BI FWL2N                             | False                    | False                       | False                           | False                    |

Table 5. Metaparameter settings (rows) for each of the learning rules obtained by large-scale searches (columns). Continuous values were rounded up to 4 decimal places.

- Ratio between the weighting of  $\mathcal{P}^{\text{amp}}$  and  $\mathcal{P}^{\text{decay}}$  given by  $\alpha/\beta \in [0.1, 200]$ , sampled uniformly.
- The weighting of  $\mathcal{P}^{\text{decay}}$  given by  $\beta \in [10^{-11}, 10^7]$ , sampled log-uniformly.

We fix all other metaparameters as prescribed by Akrou et al. (2019), namely batch centering the backward path inputs and forward path outputs in the backward pass, as well as applying a ReLU activation function and bias to the forward path but not to the backward path in the backward pass. To keep the learning rule fully local, we do not allow for any transport during the mirroring phase of the batch normalization mean and standard deviation as Akrou et al. (2019) allow.

B.1.2.  $\mathcal{R}_{WM+AD}^{TPE}$  SEARCH SPACE

Below is a description of the metaparameters and their ranges for the search that gave rise to  $\mathcal{R}_{WM+AD}^{TPE}$  in Table 3.

- Train batch size  $|\mathcal{B}| \in \{256, 1024, 2048, 4096\}$ . This choice also determines the forward path Nesterov mo-

mentum learning rate on the *pseudogradient* of the categorization objective  $\mathcal{J}$ , as it is set to be  $|\mathcal{B}|/2048$ , and linearly warm it up to this value for 6 epochs followed by 90% decay at 30, 60, and 80 epochs, training for 100 epochs total, as prescribed by Buchlovsky et al. (2019).

- Alignment learning rate  $\eta \in [10^{-6}, 10^{-2}]$ , sampled log-uniformly. This parameter sets the adaptive learning rate on the Adam optimizer applied to the *gradient* of the alignment loss  $\mathcal{R}$ , and which will be dropped synchronously by 90% decay at 30, 60, and 80 epochs along with the Nesterov momentum learning rate on the *pseudogradient* of the categorization objective  $\mathcal{J}$ .
- Number of delay epochs  $de \in \{0, 1, 2\}$  for which we delay optimization of the categorization objective  $\mathcal{J}$  and solely optimize the alignment loss  $\mathcal{R}$ . If  $de > 0$ , we use the alignment learning rate  $\eta$  during this delay period and the learning rate drops are shifted by  $de$  epochs; otherwise, if  $de = 0$ , we linearly warmup  $\eta$  for 6 epochs as well.

- Whether or not to perform alternating minimization of  $\mathcal{J}$  and  $\mathcal{R}$  each step, or instead simultaneously optimize these objectives in a single training step.

The remaining metaparameters and their ranges were the same as those from Appendix B.1.1.

We fix the layer-wise operations as prescribed by Akrouf et al. (2019), namely batch centering the backward path input and forward path outputs in the backward pass (**BI BWMC** and **FO BWMC**, respectively), as well as applying a ReLU activation function and bias to the forward path (**FO ReLU** and **FO Bias**, respectively) but not to the backward path in the backward pass (**BO ReLU** and **BO Bias**, respectively).

### B.1.3. $\mathcal{R}_{\text{WM+AD+OPS}}^{\text{TPE}}$ SEARCH SPACE

Below is a description of the metaparameters and their ranges for the search that gave rise to  $\mathcal{R}_{\text{WM+AD+OPS}}^{\text{TPE}}$  in Table 3. In this search, we expand the search space described in Appendix B.1.2 to include boolean choices over layer-wise operations performed in the *backward pass*, involving either the inputs, the forward path  $f_l$  (involving only the forward weights  $W_l$ ), or the backward path  $b_l$  (involving only the backward weights  $B_l$ ):

Use of biases in the forward and backward paths:

- **FO Bias:** Whether or not to use biases in the forward path.
- **BO Bias:** Whether or not to use biases in the backward path.

Use of nonlinearities in the forward and backward paths:

- **FO ReLU:** Whether or not to apply a ReLU to the forward path output.
- **BO ReLU:** Whether or not to apply a ReLU to the backward path output.

Centering and normalization operations in the forward and backward paths:

- **FO BWMC:** Whether or not to mean center (across the *batch* dimension) the forward path output  $f_l = f_l - \bar{f}_l$ .
- **BI BWMC:** Whether or not to mean center (across the *batch* dimension) the backward path *input*.
- **FO FWMC:** Whether or not to mean center (across the *feature* dimension) the forward path output  $f_l = f_l - \hat{f}_l$ .

- **BO FWMC:** Whether or not to mean center (across the *feature* dimension) the backward path output  $b_l = b_l - \hat{b}_l$ .

- **FO FWL2N:** Whether or not to L2 normalize (across the feature dimension) the forward path output  $f_l = (f_l - \hat{f}_l) / \|f_l - \hat{f}_l\|_2$ .

- **BO FWL2N:** Whether or not to L2 normalize (across the feature dimension) the backward path output  $b_l = (b_l - \hat{b}_l) / \|b_l - \hat{b}_l\|_2$ .

Centering and normalization operations applied to the inputs to the backward pass:

- **BI FWMC:** Whether or not to mean center (across the feature dimension) the backward pass input  $x_l = x_l - \hat{x}_l$ .

- **BI FWL2N:** Whether or not to L2 normalize (across the feature dimension) the backward pass input  $x_l = (x_l - \hat{x}_l) / \|x_l - \hat{x}_l\|_2$ .

The remaining metaparameters and their ranges were the same as those from Appendix B.1.2.

### B.1.4. $\mathcal{R}_{\text{IA}}^{\text{TPE}}$ SEARCH SPACE

Below is a description of the metaparameters and their ranges for the search that gave rise to  $\mathcal{R}_{\text{IA}}^{\text{TPE}}$  in Table 3. In this search, we expand the search space described in Appendix B.1.3, to now include the additional  $\mathcal{P}^{\text{null}}$  primitive.

- The weighting of  $\mathcal{P}^{\text{null}}$  given by  $\gamma \in [10^{-11}, 10^7]$ , sampled log-uniformly.

The remaining metaparameters and their ranges were the same as those from Appendix B.1.3.

## B.2. Symmetric and Activation Alignment metaparameters

We now describe the metaparameters used to generate Table 4. We used a batch size of 256, forward path Nesterov with Momentum of 0.9 and a learning rate of 0.1 applied to the categorization objective  $\mathcal{J}$ , warmed up linearly for 5 epochs, with learning rate drops at 30, 60, and 80 epochs, trained for a total of 90 epochs, as prescribed by He et al. (2016).

For Symmetric and Activation Alignment ( $\mathcal{R}_{\text{SA}}$  and  $\mathcal{R}_{\text{AA}}$ ), we used Adam on the alignment loss  $\mathcal{R}$  with a learning rate of 0.001, along with the following weightings for their primitives:

- Symmetric Alignment:  $\alpha = 10^{-3}, \beta = 2 \times 10^{-3}$

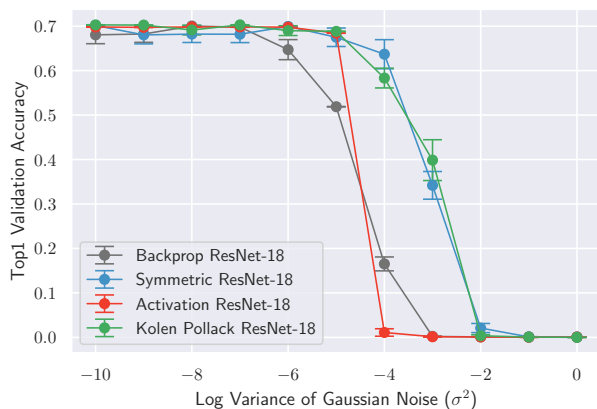

Figure S1. **Noisy updates.** Symmetric Alignment, Activation Alignment, and Kolen-Pollack are *more* robust to noisy updates than backpropagation for ResNet-18.

- Activation Alignment:  $\alpha = 10^{-3}, \beta = 2 \times 10^{-3}$

We use biases in both the forward and backward paths of the backward pass, but do *not* employ a ReLU nonlinearity to either path.

### B.3. Noisy updates

We describe the experimental setup and metaparameters used in §5 to generate Fig. 5.

Fig. 5a was generated by running 10 trials for each experiment configuration. The error bars show the standard error of the mean across trials.

For backpropagation we used a momentum optimizer with an initial learning rate of 0.1, standard batch size of 256, and learning rate drops at 30 and 60 epochs.

For Symmetric and Activation Alignment we used the same metaparameters as backpropagation for the categorization objective  $\mathcal{J}$  and an Adam optimizer with an initial learning rate of 0.001 and learning rate drops at 30 and 60 epochs for the alignment loss  $\mathcal{R}$ . All other metaparameters were the same as described in Appendix B.2.

In all experiments we added the noise to the update given by the respective optimizers and scaled by the current learning rate, that way at learning rate drops the noise scaled appropriately. To account for the fact that the initial learning rate for the backpropagation experiments was 0.1, while for symmetric and activation experiments it was 0.001, we shifted the latter two curves by  $10^4$  to account for the effective difference in variance. See Fig. S1.

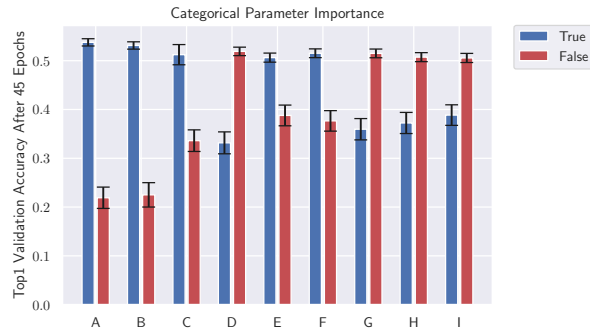

Figure S2. **Analysis of important categorical metaparameters of top performing local rule  $\mathcal{R}_{LA}^{TPE}$ .** Mean across models, and the error bars indicate SEM across models.

### B.4. Metaparameter importance quantification

We include here the set of discrete metaparameters that mattered the most across hundreds of models in our large-scale search, sorted by most to least important, plotted in Fig. S2. Specifically, these amount to choices of activation, layer-wise normalization, input normalization, and Gaussian noise in the forward and backward paths of the backward pass. The detailed labeling is given as follows: **A**: Whether or not to L2 normalize (across the feature dimension) the backward path outputs in the backward pass. **B**: Whether to use Gaussian noise in the backward pass inputs. **C**: Whether to solely optimize the alignment loss in the first 1-2 epochs of training. **D, E**: Whether or not to apply a non-linearity in the backward or forward path outputs in the backward pass, respectively. **F**: Whether or not to apply a bias in the forward path outputs (pre-nonlinearity). **G, H**: Whether or not to mean center or L2 normalize (across the feature dimension) the inputs to the backward pass. **I**: Same as **A**, but instead applied to the forward path outputs in the backward pass.

### B.5. Neural Fitting Procedure

We fit trained model features to multi-unit array responses from (Majaj et al., 2015). Briefly, we fit to 256 recorded sites from two monkeys. These came from three multi-unit arrays per monkey: one implanted in V4, one in posterior IT, and one in central and anterior IT. Each image was presented approximately 50 times, using rapid visual stimulus presentation (RSVP). Each stimulus was presented for 100 ms, followed by a mean gray background interleaved between images. Each trial lasted 250 ms. The image set consisted of 5120 images based on 64 object categories. Each image consisted of a 2D projection of a 3D model added to a random background. The pose, size, and  $x$ - and  $y$ -position of the object was varied across the image set, whereby 2 levels of variation were used (corresponding to medium and high variation from (Majaj et al., 2015).) Multi-unit responses

to these images were binned in 10ms windows, averaged across trials of the same image, and normalized to the average response to a blank image. They were then averaged 70-170 ms post-stimulus onset, producing a set of (5120 images x 256 units) responses, which were the targets for our model features to predict. The 5120 images were split 75-25 within each object category into a training set and a held-out testing set.

## C. Visualizations

In this section we present some visualizations which deepen the understanding of the weight dynamics and stability during training, as presented in §4 and §5. By looking at the weights of the network at each validation point, we are able to compare corresponding forward and backward weights (see Fig. S3) as well as to measure the angle between the vectorized forward and backward weight matrices to quantify their degree of alignment (see Fig. S4). Their similarity in terms of scale can also be evaluated by looking at the ratio of the Frobenius norm of the backward weight matrix to the forward weight matrix,  $\|B_l\|_F/\|W_l\|_F$ . Separately plotting these metrics in terms of model depth sheds some insight into how different layers behave.

## D. Further Analysis

### D.1. Instability of Weight Mirror

As explained in §4, the instability of weight mirror can be understood by considering the dynamical system given by the symmetrized gradient flow on  $\mathcal{R}_{SA}$ ,  $\mathcal{R}_{AA}$ , and  $\mathcal{R}_{WM}$  at a given layer  $l$ . By symmetrized gradient flow we imply the gradient dynamics on the loss  $\mathcal{R}$  modified such that it is symmetric in both the forward and backward weights. We ignore biases and non-linearities and set  $\alpha = \beta$  for all three losses.

When the weights,  $w_l$  and  $b_l$ , and input,  $x_l$ , are all scalar values, the gradient flow for all three losses gives rise to the dynamical system,

$$\frac{\partial}{\partial t} \begin{bmatrix} w_l \\ b_l \end{bmatrix} = -A \begin{bmatrix} w_l \\ b_l \end{bmatrix},$$

For Symmetric Alignment and Activation Alignment,  $A$  is respectively the positive semidefinite matrix

$$A_{SA} = \begin{bmatrix} 1 & -1 \\ -1 & 1 \end{bmatrix} \quad \text{and} \quad A_{AA} = \begin{bmatrix} x_l^2 & -x_l^2 \\ -x_l^2 & x_l^2 \end{bmatrix}.$$

For weight mirror,  $A$  is the symmetric indefinite matrix

$$A_{WM} = \begin{bmatrix} \lambda_{WM} & -x_l^2 \\ -x_l^2 & \lambda_{WM} \end{bmatrix}.$$

In all three cases  $A$  can be diagonally decomposed by the

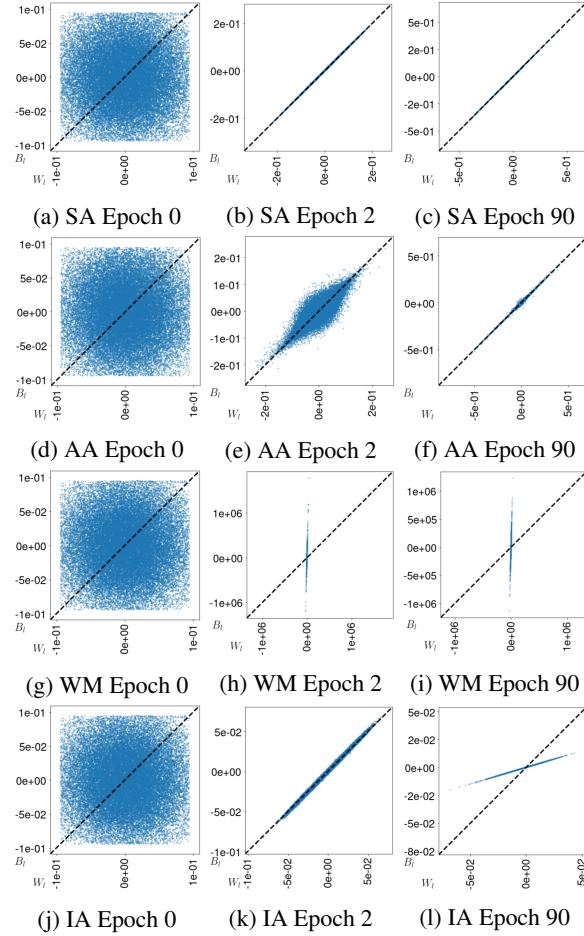

**Figure S3. Learning symmetry.** Weight values of the third convolutional layer in ResNet-18 throughout training with various learning rules. Each dot represents an element in layer  $l$ 's weight matrix and its  $(x, y)$  location corresponds to its forward and backward weight values,  $(W_l^{(i,j)}, B_l^{(j,i)})$ . The dotted diagonal line shows perfect weight symmetry, as is the case in backpropagation.

eigenbasis

$$\{u, v\} = \left\{ \begin{bmatrix} 1 \\ 1 \end{bmatrix}, \begin{bmatrix} 1 \\ -1 \end{bmatrix} \right\},$$

where  $u$  spans the symmetric component and  $v$  spans the skew-symmetric component of any realization of the weight vector  $[w_l \ b_l]^\top$ .

As explained in §4, under this basis, the dynamical system decouples into a system of ODEs governed by the eigenvalues  $\lambda_u$  and  $\lambda_v$  associated with  $u$  and  $v$ . For all three learning rules,  $\lambda_v > 0$  ( $\lambda_v$  is respectively 1,  $x^2$ , and  $\lambda_{WM} + x_l^2$  for SA, AA, and weight mirror). For SA and AA,  $\lambda_u = 0$ , while for weight mirror  $\lambda_u = \lambda_{WM} - x_l^2$ .

## Two Routes to Scalable Credit Assignment without Weight Symmetry

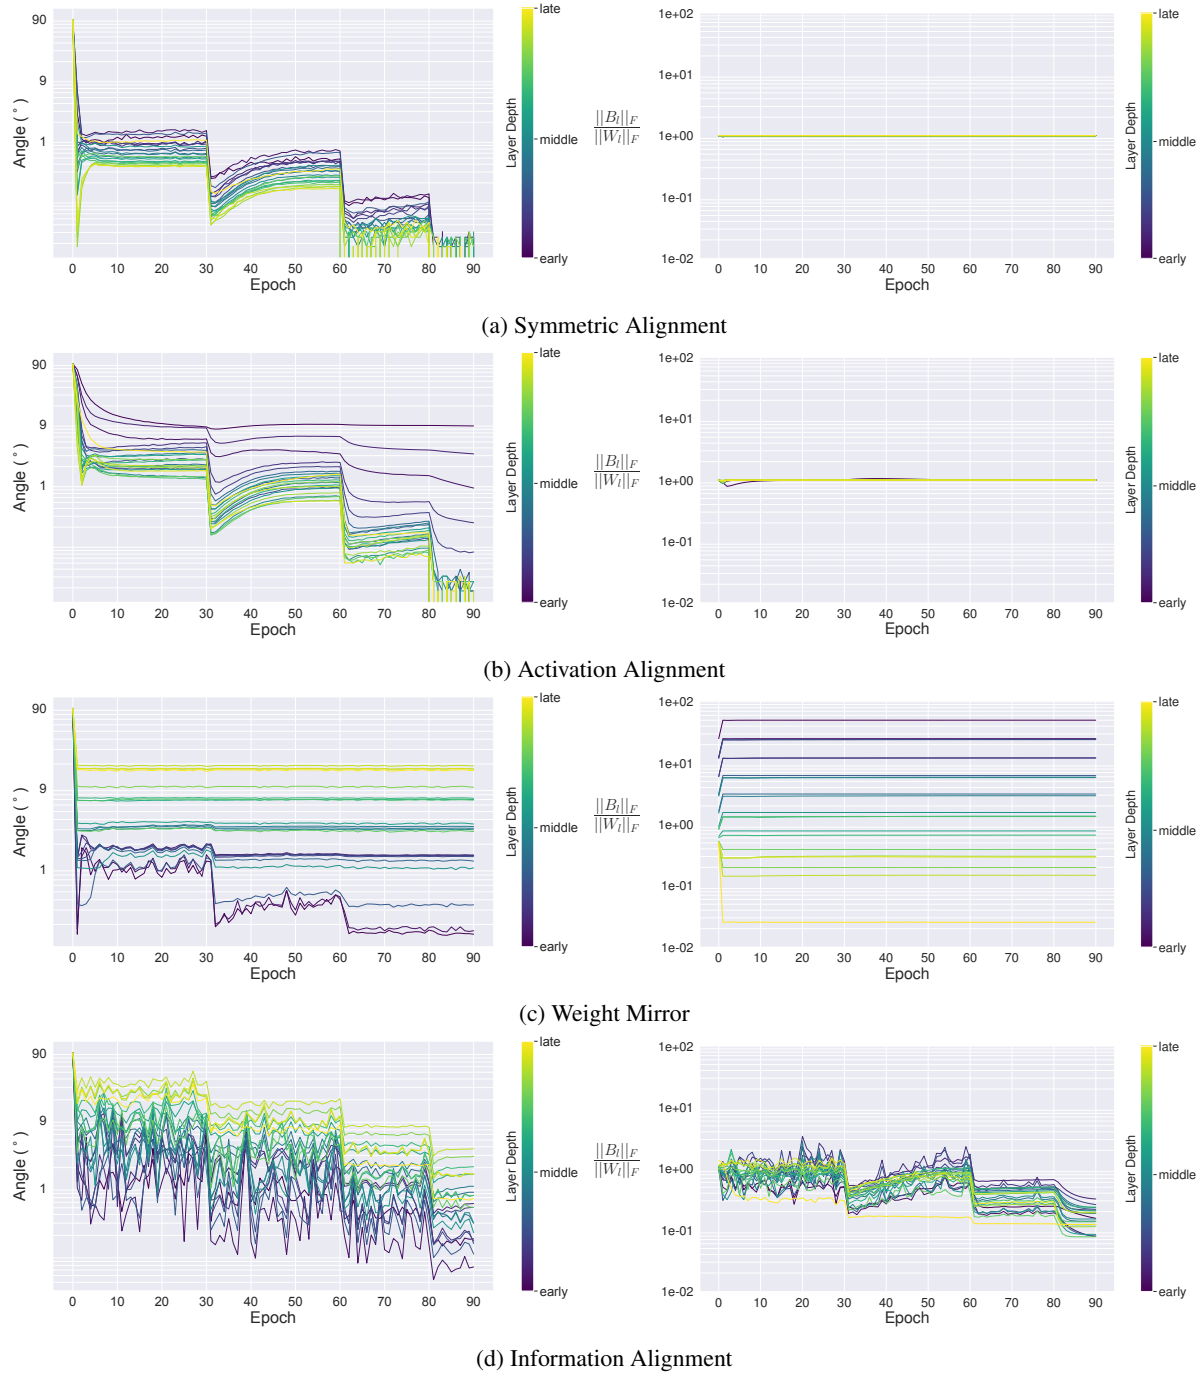

**Figure S4. Weight metrics during training.** Figures on the left column show the angle between the forward and the backward weights at each layer, depicting their degree of alignment. Figures on the right column show the ratio of the Frobenius norm of the backward weights to the forward weights during training. For Symmetric Alignment (a) we can clearly see how the weights align very early during training, with the learning rate drops allowing them to further decrease. Additionally, the sizes of forward and backwards weight also remain at the same scale during training. Activation Alignment (b) shows similar behavior to activation, though some of the earlier layers fail to align as closely as the Symmetric Alignment case. Weight Mirror (c) shows alignment happening within the first few epochs, though some of the later layers don't align as closely. Looking at the size of the weights during training, we can observe the unstable dynamics explained in §4 with exploding and collapsing weight values (Fig. 2) within the first few epochs of training. Information Alignment (d) shows a similar ordering in alignment as weight mirror, but overall alignment does improve throughout training, with all layers aligning within 5 degrees. Compared to weight mirror, the norms of the weights are more stable, with the backward weights becoming smaller than their forward counterparts towards the end of training.

## D.2. Beyond Feedback Alignment

An underlying assumption of our work is that certain forms of layer-wise regularization, such as the regularization introduced by Symmetric Alignment, can actually improve the performance of feedback alignment by introducing dynamics on the backward weights. To understand these improvements, we build off of prior analyses of backpropagation (Saxe et al., 2013) and feedback alignment (Baldi et al., 2018).

Consider the simplest nontrivial architecture: a two layer scalar linear network with forward weights  $w_1, w_2$ , and backward weight  $b$ . The network is trained with scalar data  $\{x_i, y_i\}_{i=1}^n$  on the mean squared error cost function

$$\mathcal{J} = \sum_{i=1}^n \frac{1}{2n} (y_i - w_2 w_1 x_i)^2.$$

The gradient flow of this network gives the coupled system of differential equations on  $(w_1, w_2, b)$

$$\dot{w}_1 = b(\alpha - w_2 w_1 \beta) \quad (2)$$

$$\dot{w}_2 = w_1(\alpha - w_2 w_1 \beta) \quad (3)$$

where  $\alpha = \sum_{i=1}^n \frac{y_i x_i}{n}$  and  $\beta = \sum_{i=1}^n \frac{x_i^2}{n}$ . For backpropagation the dynamics are constrained to the hyperplane  $b = w_2$ , while for feedback alignment the dynamics are contained on the hyperplane  $b = b(0)$  given by the initialization. For Symmetric Alignment, an additional differential equation

$$\dot{b} = w_2 - b, \quad (4)$$

attracts all trajectories to the backpropagation hyperplane  $b = w_2$ .

To understand the properties of these alignment strategies, we explore the fixed points of their flow. From equation (2) and (3) we see that both equations are zero on the hyperbola

$$w_2 w_1 = \frac{\alpha}{\beta},$$

which is the set of minima of  $\mathcal{J}$ . From equation (4) we see that all fixed points of Symmetric Alignment satisfy  $b = w_2$ . Thus, all three alignment strategies have fixed points on the hyperbola of minima intersected with either the hyperplane  $b = b(0)$  in the case of feedback alignment or  $b = w_2$  in the case of backpropagation and Symmetric Alignment.

In addition to these non-zero fixed points, equation (2) and (3) are zero if  $b$  and  $w_1$  are zero respectively. For backpropagation and Symmetric Alignment this also implies  $w_2 = 0$ , however for feedback alignment  $w_2$  is free to be any value. Thus, all three alignment strategies have rank-deficient fixed points at the origin  $(0, 0, 0)$  and in the case of feedback alignment more generally on the hyperplane  $b = w_1 = 0$ .

To understand the stability of these fixed points we consider the local linearization of the vector field by computing the Jacobian matrix<sup>5</sup>

$$J = \begin{bmatrix} \partial_{w_1} \dot{w}_1 & \partial_{w_1} \dot{w}_2 & \partial_{w_1} \dot{b} \\ \partial_{w_2} \dot{w}_1 & \partial_{w_2} \dot{w}_2 & \partial_{w_2} \dot{b} \\ \partial_b \dot{w}_1 & \partial_b \dot{w}_2 & \partial_b \dot{b} \end{bmatrix}.$$

A source of the gradient flow is characterized by non-positive eigenvalues of  $J$ , a sink by non-negative eigenvalues of  $J$ , and a saddle by both positive and negative eigenvalues of  $J$ .

On the hyperbola  $w_2 w_1 = \frac{\alpha}{\beta}$  the Jacobian matrix for the three alignment strategies have the corresponding eigenvalues:

|           | $\lambda_1$            | $\lambda_2$ | $\lambda_3$ |
|-----------|------------------------|-------------|-------------|
| Backprop. | $-(w_1^2 + w_2^2) x^2$ | 0           |             |
| Feedback  | $-(w_1^2 + b w_2) x^2$ | 0           | 0           |
| Symmetric | $-(w_1^2 + w_2^2) x^2$ | 0           | -1          |

Thus, for backpropagation and Symmetric Alignment, all minima of the the cost function  $\mathcal{J}$  are sinks, while for feedback alignment the stability of the minima depends on the sign of  $w_1^2 + b w_2$ .

From this simple example there are two major takeaways:

1. All minima of the cost function  $\mathcal{J}$  are sinks of the flow given by backpropagation and Symmetric Alignment, but only some minima are sinks of the flow given by feedback alignment.
2. Backpropagation and Symmetric Alignment have the exact same critical points, but feedback alignment has a much larger space of rank-deficient critical points.

Thus, even in this simple example it is clear that certain dynamics on the backward weights can have a stabilizing effect on feedback alignment.

## D.3. Kolen-Pollack Learning Rule

If we consider primitives that are functions of the pseudo-gradients  $\tilde{\nabla}_l$  and  $\tilde{\nabla}_{l+1}$  in addition to the forward weight  $W_l$ , backward weight  $B_l$ , layer input  $x_l$ , and layer output  $x_{l+1}$ , then the Kolen-Pollack algorithm, originally proposed by Kolen & Pollack (1994) and modified by Akrouf et al. (2019), can be understood in our framework.

The Kolen-Pollack algorithm circumvents the weight transport problem, by instead transporting the weight updates

<sup>5</sup>In the case that the vector field is the negative gradient of a loss, as in backpropagation, then this is the negative Hessian of the loss.

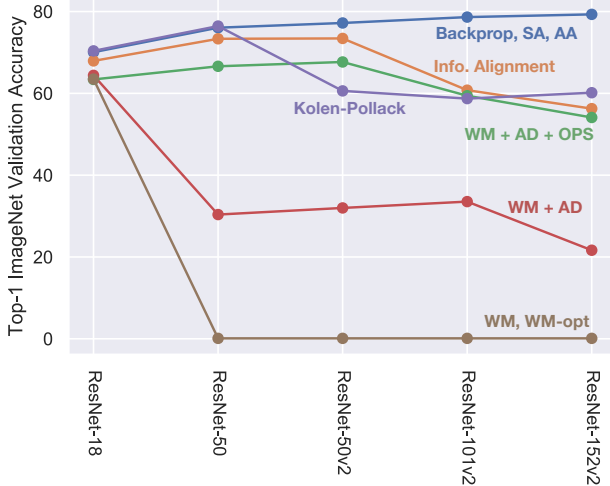

**Figure S5. Performance of Kolen-Pollack across architectures.** We fixed the categorical and continuous metaparameters for ResNet-18 and applied them directly to deeper and different ResNet variants (e.g. v2) as in Fig. 3. The Kolen-Pollack learning rule, matched backpropagation performance for ResNet-18 and ResNet-50, but a performance gap emerged for different (ResNet-50v2) and deeper (ResNet-101v2, ResNet-152v2) architectures.

and adding weight decay. Specifically, the forward and backward weights are updated respectively by

$$\begin{aligned}\Delta W_l &= -\eta \tilde{\nabla}_{l+1} x_l^\top - \lambda_{\text{KP}} W_l, \\ \Delta B_l &= -\eta x_l \tilde{\nabla}_{l+1}^\top - \lambda_{\text{KP}} B_l,\end{aligned}$$

where  $\eta$  is the learning rate and  $\lambda_{\text{KP}}$  a weight decay constant. The forward weight update is the standard pseudogradient update with weight decay, while the backward weight update is equivalent to gradient descent on

$$\text{tr}(x_l^\top B_l \tilde{\nabla}_{l+1}) + \frac{\lambda_{\text{KP}}}{2\eta} \|B_l\|^2.$$

Thus, if we define the *angle* primitive

$$\mathcal{P}_l^{\text{angle}} = \text{tr}(x_l^\top B_l \tilde{\nabla}_{l+1}) = \text{tr}(x_l^\top \tilde{\nabla}_l),$$

then the **Kolen-Pollack (KP)** update is given by gradient descent on the layer-wise regularization function

$$\mathcal{R}_{\text{KP}} = \sum_{l \in \text{layers}} \alpha \mathcal{P}_l^{\text{angle}} + \beta \mathcal{P}_l^{\text{decay}},$$

for  $\alpha = 1$  and  $\beta = \frac{\lambda_{\text{KP}}}{\eta}$ . The angle primitive encourages alignment of the forward activations with the backward pseudogradients and is local according to the criterion for locality defined in §3.1. Thus, the Kolen-Pollack learning rule only involves the use of local primitives, but it does necessitate that the backward weight update given by the angle primitive is the exact transpose to the forward weight

update at each step of training. This constraint is essential to showing theoretically how Kolen-Pollack leads to alignment of the forward and backward weights (Kolen & Pollack, 1994), but it is clearly as biologically suspect as exact weight symmetry. To determine empirically how robust Kolen-Pollack is when loosening this hard constraint, we add random Gaussian noise to each update. As shown in Fig. S1, even with certain levels of noise, the Kolen-Pollack learning rule can still lead to well performing models. This suggests that a noisy implementation of Kolen-Pollack that removes the constraint of exactness might be biologically feasible.

While Kolen-Pollack uses significantly fewer metaparameters than weight mirror or information alignment, the correct choice of these metaparameters is highly dependent on the architecture. As shown in Fig. S5, the Kolen-Pollack learning rule, with metaparameters specified by Akrouit et al. (2019), matched backpropagation performance for ResNet-18 and ResNet-50. However, a considerable performance gap with backpropagation as well as our proposed learning rules (information alignment, SA, and AA) emerged for different (ResNet-50v2) and deeper (ResNet-101v2, ResNet-152v2) architectures, providing additional evidence for the necessity of the circuits we propose in maintaining robustness across architecture.
